# Supplementary material for: Synergistic effects of β-NaFeO2 ferrite nanoparticles for photocatalytic degradation, antibacterial, and antioxidant applications
Source: Royal Society of Chemistry journal article supplement (doi:10.1039/d4ra02430c), 2024-01-01
Supplement: d4ra02430c1.pdf [file d4ra02430c1.pdf]

**Supplementary Section: Synergistic Effects of  $\beta$ -NaFeO<sub>2</sub> Ferrite Nanoparticles for  
Photocatalytic Degradation, Antibacterial, and Antioxidant Applications**

Tahira Jabeen <sup>1,\*</sup>, Muhammad Shahid Khan <sup>1,\*</sup>, Sana Javaid <sup>1</sup>, Waqar Azeem <sup>2</sup>, Rabia Ayoub  
<sup>1</sup>, Martin Motola <sup>3,\*</sup>

1. Institute of Physics, The Islamia University of Bahawalpur, Bahawalpur 63100, Pakistan
2. Faculty of Resilience, Rabdan Academy, Abu Dhabi, United Arab Emirates
3. Department of Inorganic Chemistry, Faculty of Natural Sciences, Comenius University  
Bratislava, Ilkovicova 6, 842 15 Bratislava, Slovakia

\*Corresponding Author:

T. Jabeen: (✉ [tahira.jabeen1999@gmail.com](mailto:tahira.jabeen1999@gmail.com); ☎ +923016979528)

M. S. Khan (✉ [mshahid.khan@iub.edu.pk](mailto:mshahid.khan@iub.edu.pk); ☎ +923006421403)

M. Motola (✉ [martin.motola@uniba.sk](mailto:martin.motola@uniba.sk); +421 2 9014 9374)

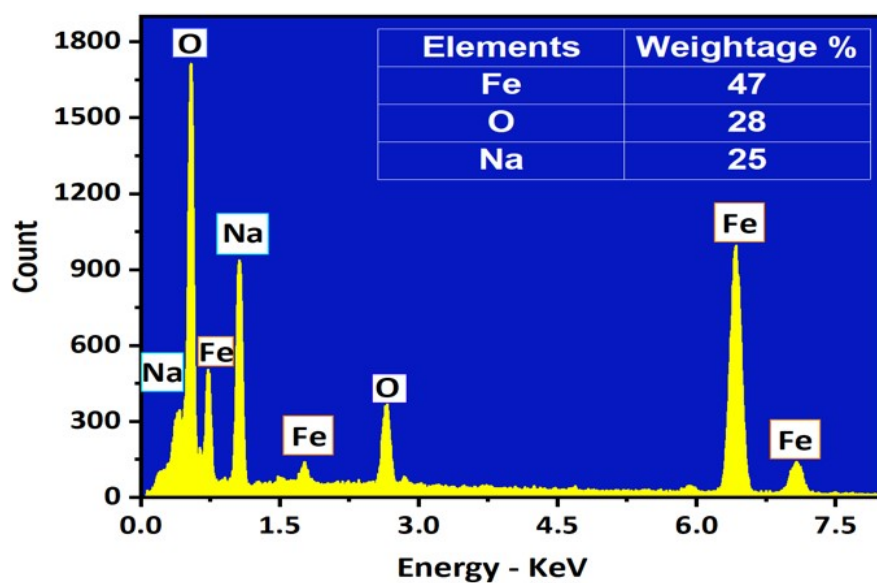

**Fig. S1.** Elemental composition of the material  $\beta$ -NaFeO<sub>2</sub> by EDS technique, with iron (Fe) constituting 47% of the overall composition, oxygen (O) comprising 28%, and sodium (Na) accounting for 25%

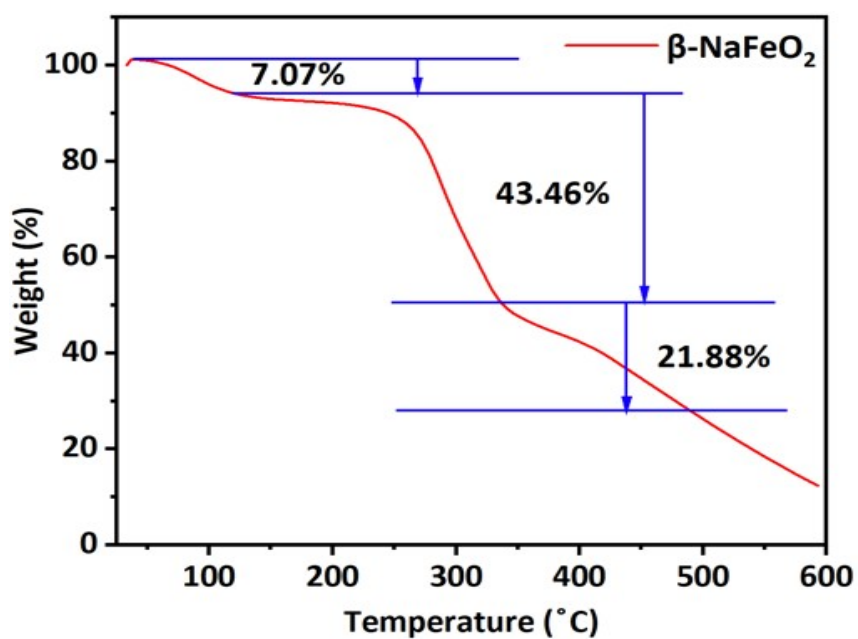

**Fig. S2.** Thermogravimetric Analysis (TGA) with weight loss patterns across temperature ranges, reflecting volatile component removal and organic decomposition during calcination.

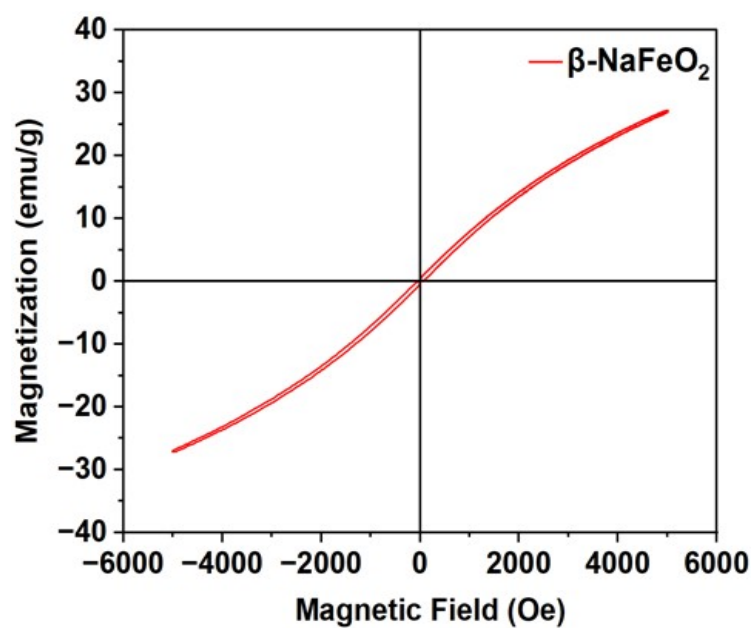

**Fig. S3.** Magnetic behavior analysis (M-H curve) shows superparamagnetic properties of  $\beta$ -NaFeO<sub>2</sub> nanoparticles with no coercivity ( $H_c$ ) or remanence magnetization ( $M_r$ ) and a saturation magnetization ( $M_s$ ) of 27.11 emu/g at room temperature.

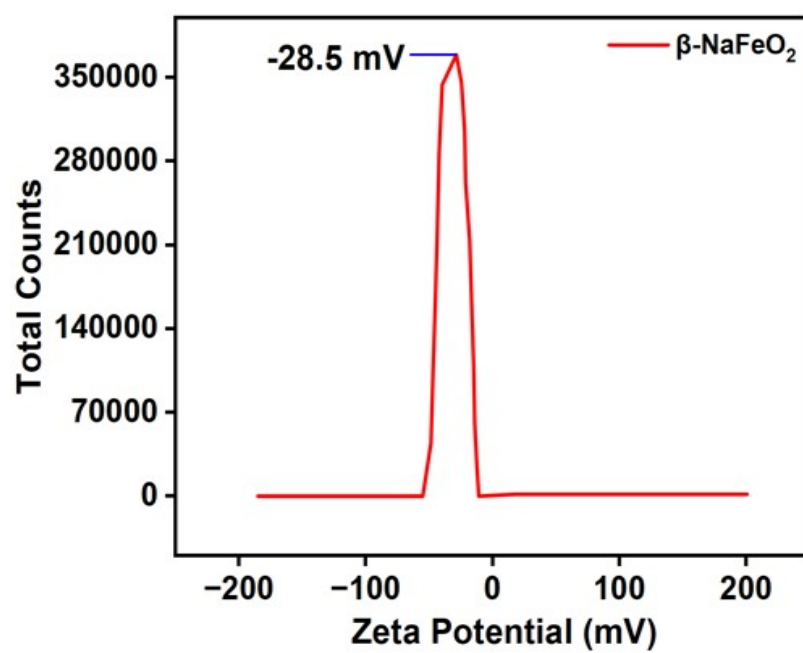

**Fig. S4.** Surface charge and colloidal stability of  $\beta$ -NaFeO<sub>2</sub> by zeta potential technique

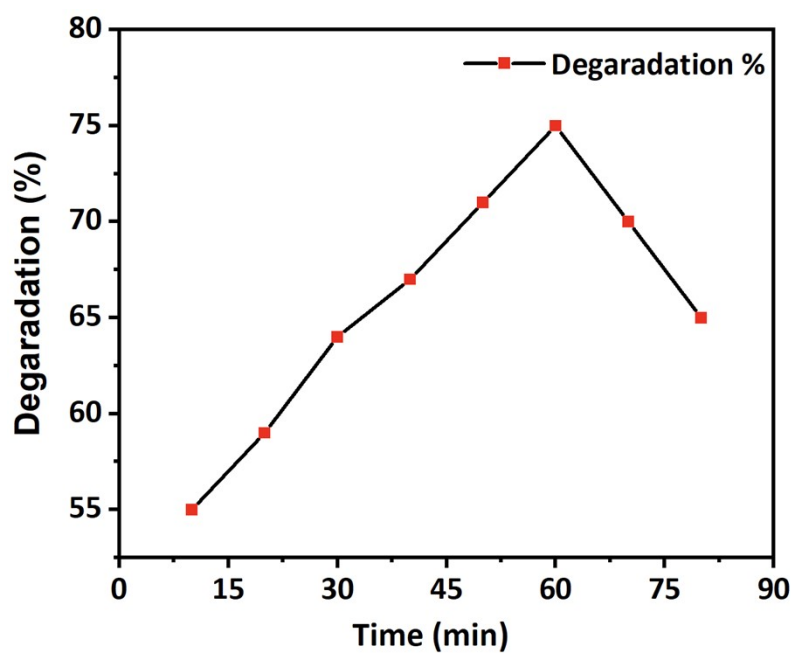

**Fig. S5.** Effect of TEMPO scavenger on photocatalytic degradation of Methyl Red Dye

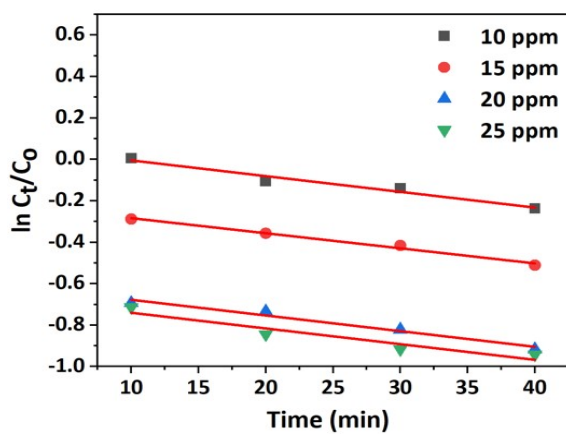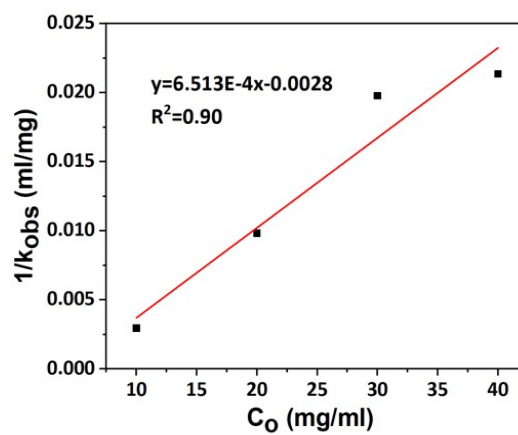

**Fig. S6.** Application of Langmuir-Hinshelwood model to analyze MR dye degradation kinetics, demonstrating strong correlation ( $R^2 = 0.90$ ) and efficiency of  $\beta$ -NaFeO<sub>2</sub> nanoparticles ( $k = 0.000613 \text{ min}^{-1}$ )
